# Supplementary material for: Sensitized piRNA reporter identifies multiple RNA processing factors involved in piRNA-mediated gene silencing
Source: PubMed Central journal article supplement (PMC9882300; doi:10.1101/2023.01.22.525052), 2023-01-22

**Title**

Sensitized piRNA reporter identifies multiple RNA processing factors involved in piRNA-mediated gene silencing

**Author List**

Jordan Brown<sup>1</sup>, Donglei Zhang<sup>1</sup>, Wenjun Chen<sup>1, 2</sup>, and Heng-Chi Lee<sup>1\*</sup>

**Affiliations**

1 Department of Molecular Genetics and Cell Biology, University of Chicago, Chicago, IL 60637, USA

2 Present address: Department of Laboratory Medicine, Third Affiliated Hospital of Sun Yat-Sen University, Guangzhou, China

\*Corresponding author: Heng-Chi Lee ([hengchilee@uchicago.edu](mailto:hengchilee@uchicago.edu))

**This supplementary information includes:**

**Figure S1. piRNA reporter screening strategy.**

**Figure S2. Loss of piRNAs following *snp-4*, *ints-1*, and *dic-1* knockdown.**

**Figure S3. NPP-1/6/7/9 and CSR-1 pathway disruption activates the sensitized piRNA reporter.**

**Figure S4. HRDE-1 does not share NRDE-3's nuclear localization signal.**

**Supplementary Table 1. Full list of candidates screened using piRNA reporter.**

**Figure S1. piRNA reporter screening strategy.**

A) A model depicts the cellular context of biogenesis and effector steps in piRNA silencing.

**Figure S2. Loss of piRNAs following *snp-4*, *ints-1*, and *dic-1* knockdown.**

A) Scatterplots show the expression of mature type I piRNAs in the indicated RNAi knockdowns.

B) Scatterplots show the expression of type I piRNA precursors in the indicated RNAi knockdowns.

C) A histogram shows the distribution of type I and type II piRNA precursor sequence lengths in cap-enriched sequencing libraries from *ints-1* and empty vector RNAi treated worms.

D) A model shows the proposed action of the Integrator complex at piRNA loci.

**Figure S3. NPP-1/6/7/9 and CSR-1 pathway disruption activates the sensitized piRNA reporter.**

A) GFP expression in type II piRNA reporter in indicated RNAi knockdowns. Asterisks indicate significant reporter activation, see Methods for details.

B) GFP expression in type I piRNA reporter in indicated RNAi knockdowns. Asterisks indicate significant reporter activation, see Methods for details.

C) Percentage of worms with dispersed GFP::CSR-1 (top) or GFP::PRG-1 (bottom) granules in the indicated RNAi knockdowns. Asterisks indicate  $p < 0.05$  in one-tailed Student's t-test.

D) Percentage of germline nuclei with nucleoli that contain NPP-7 following the indicated RNAi knockdowns. Representative fluorescent micrographs show mCherry::NPP-7 localization from indicated treatments. Treatments that also activate the piRNA reported are marked with an asterisk.

**Figure S4. HRDE-1 does not share NRDE-3's nuclear localization signal.**

- A) GFP expression in type II piRNA reporter in indicated RNAi knockdowns.
- B) A selection from the Smith-Waterman local alignment of HRDE-1 and NRDE-3 amino acid sequences that includes the NRDE-3 nuclear localization signal.

**Supplementary Table 1. Full list of candidates screened using piRNA reporter.**

- B) A model depicts the cellular context of biogenesis and effector steps in piRNA silencing.

# Figure S1

A

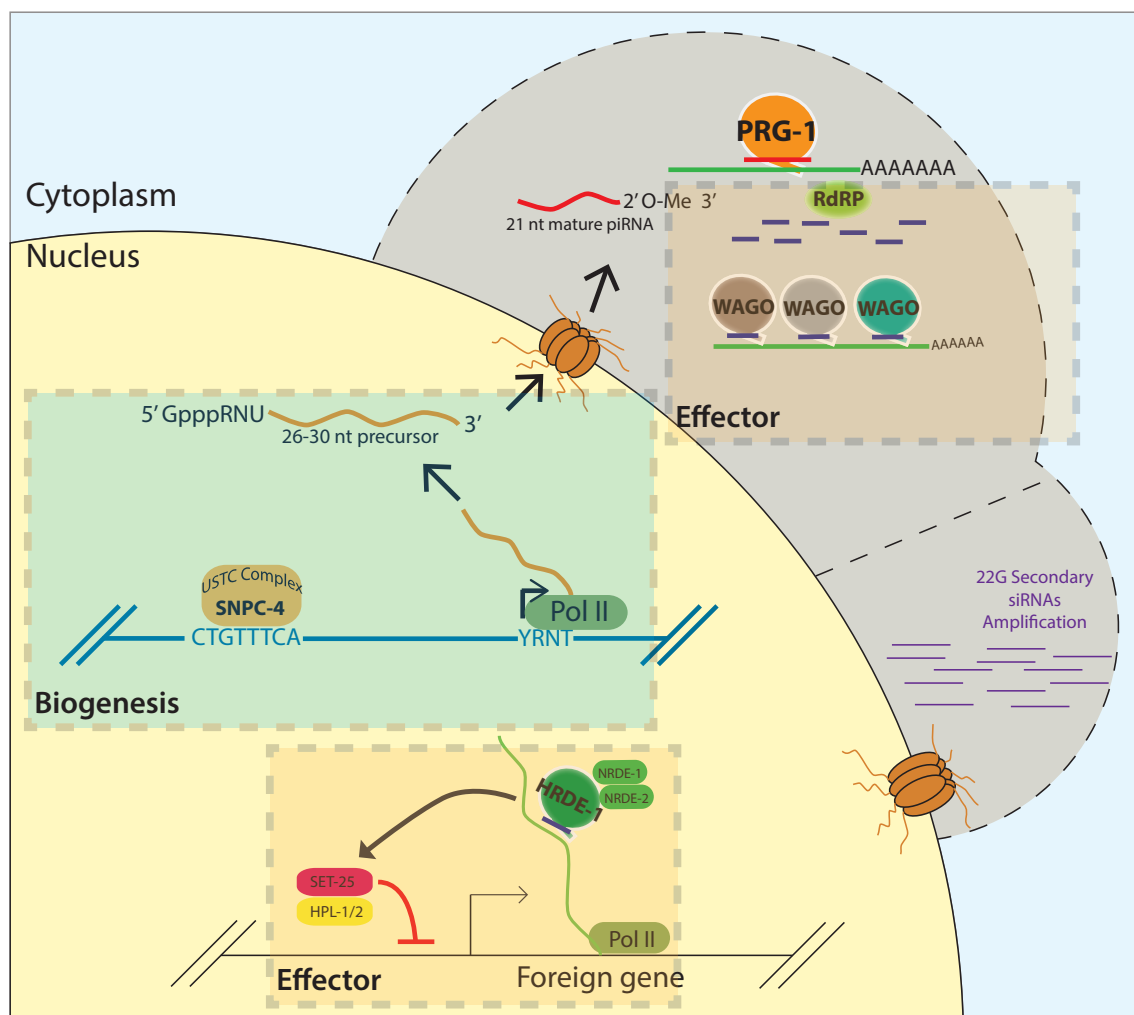

Figure S2

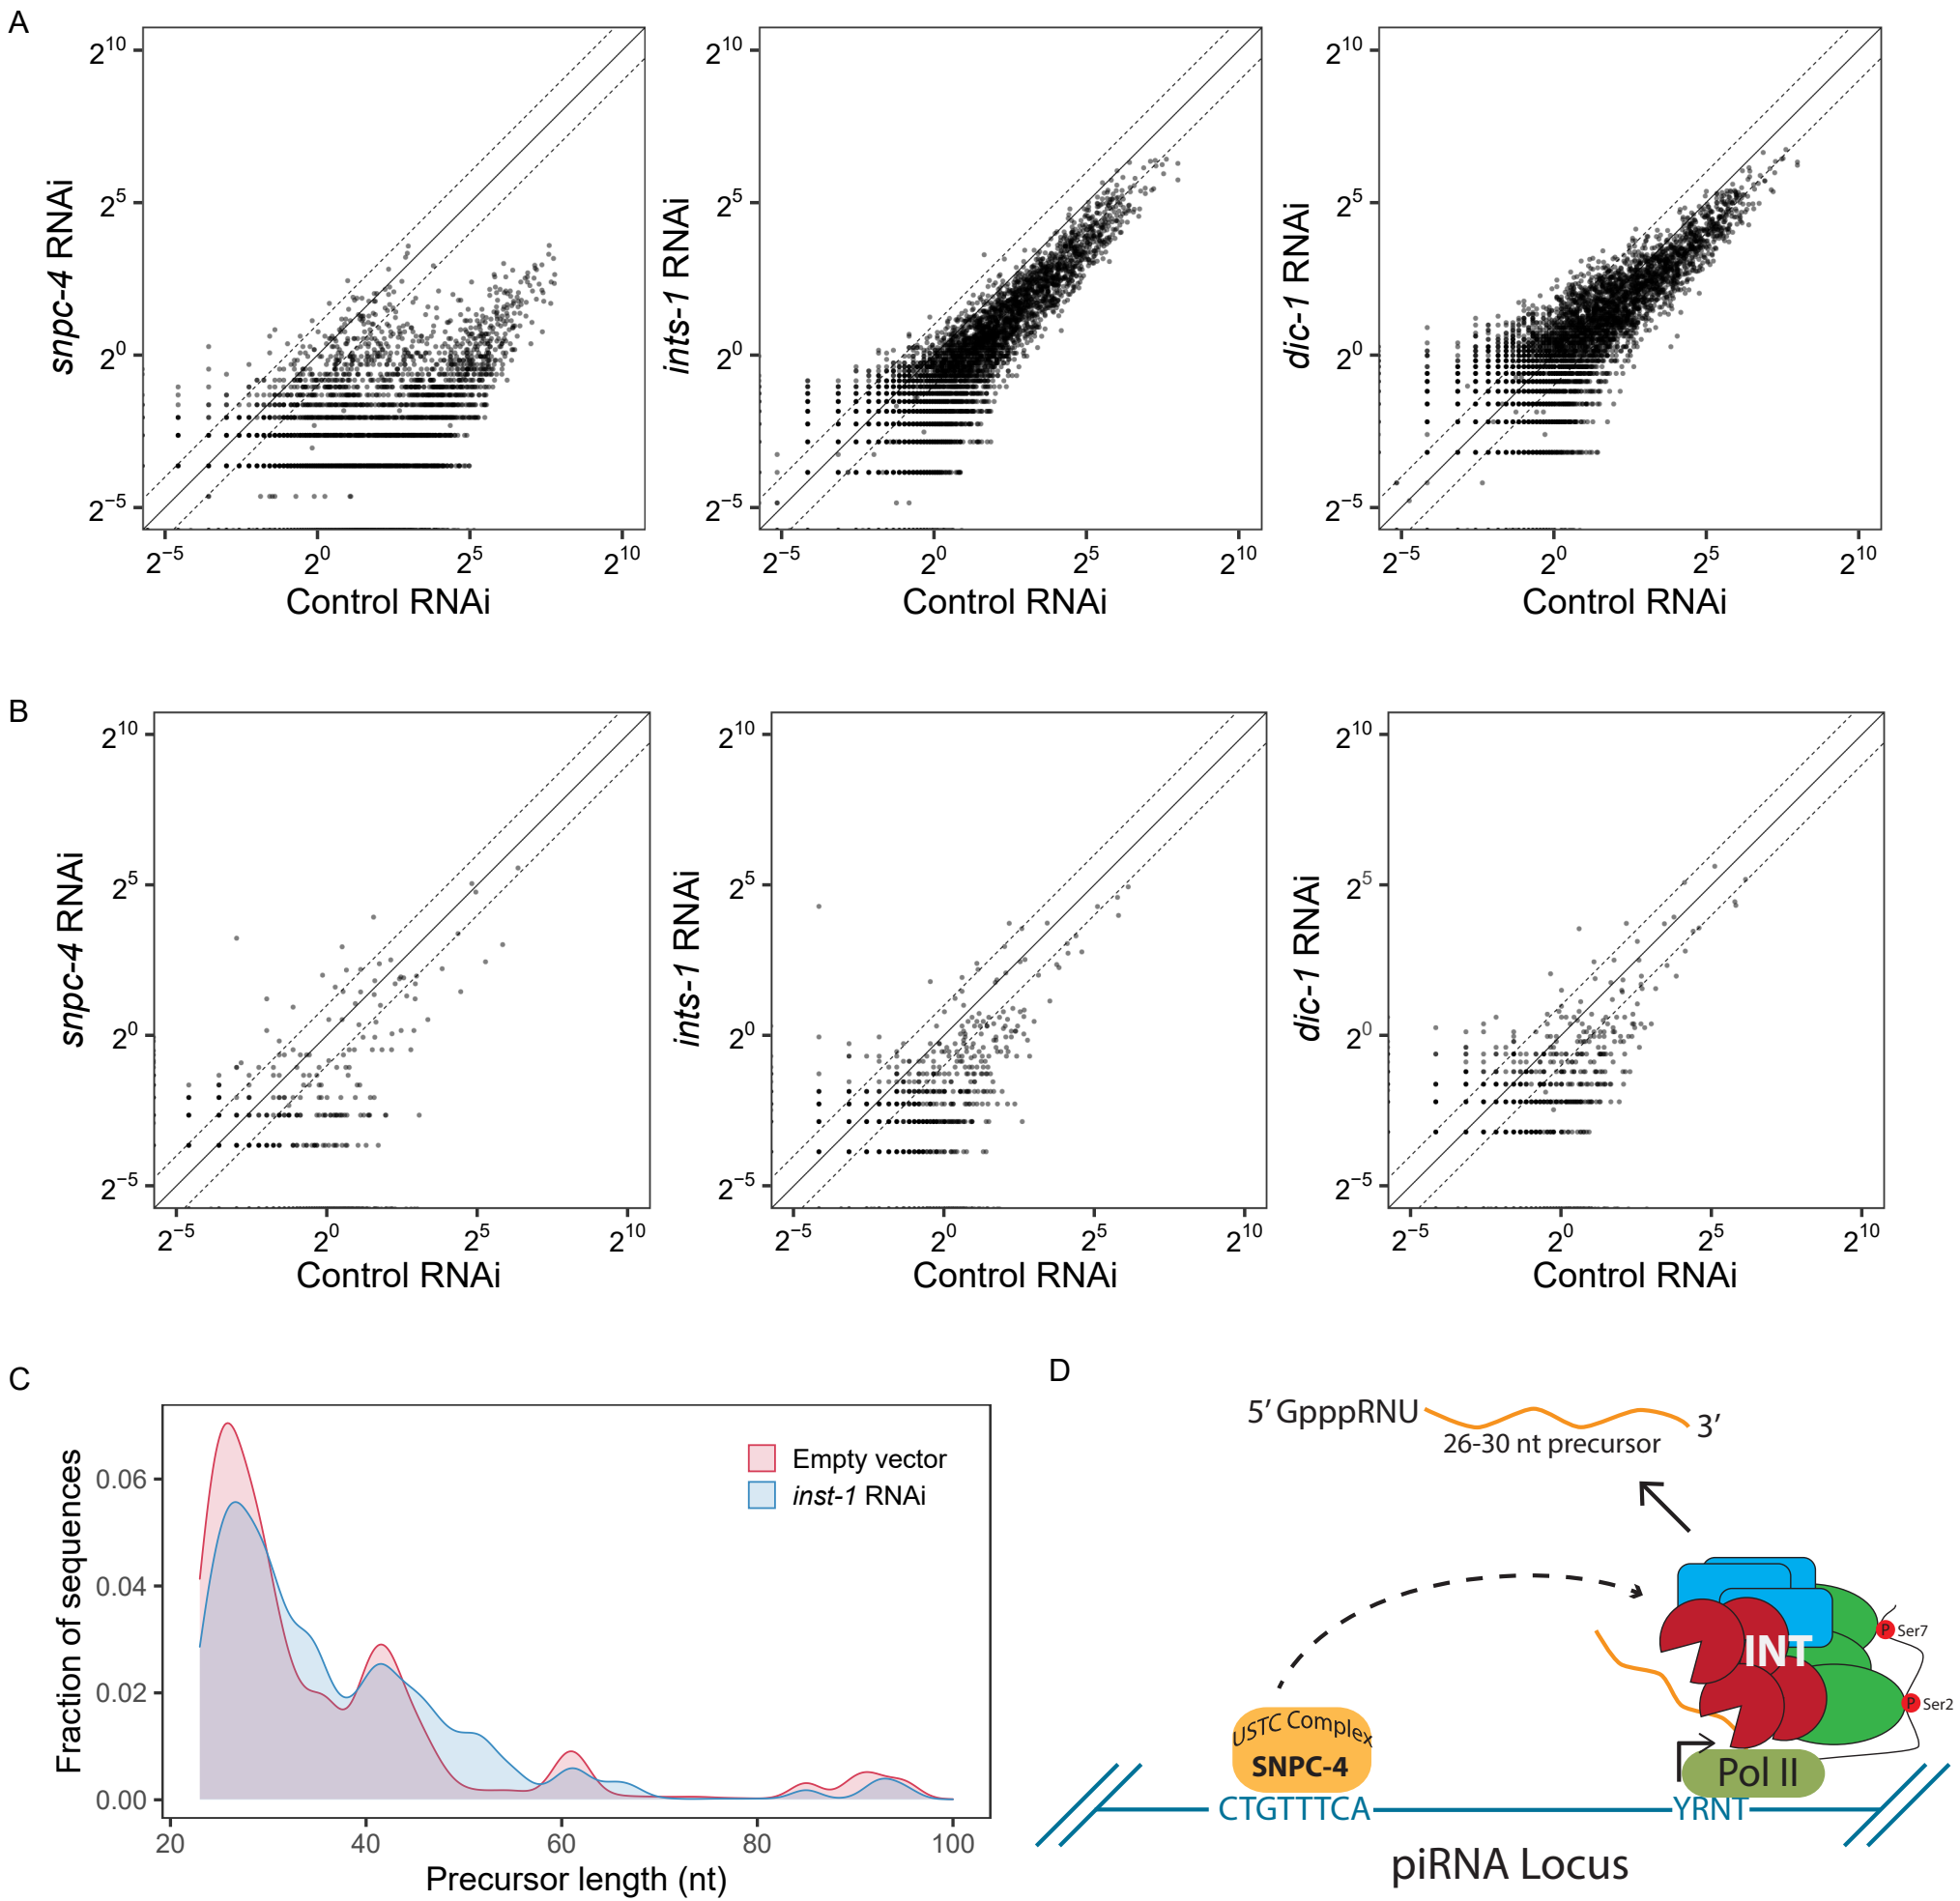

# Figure S3

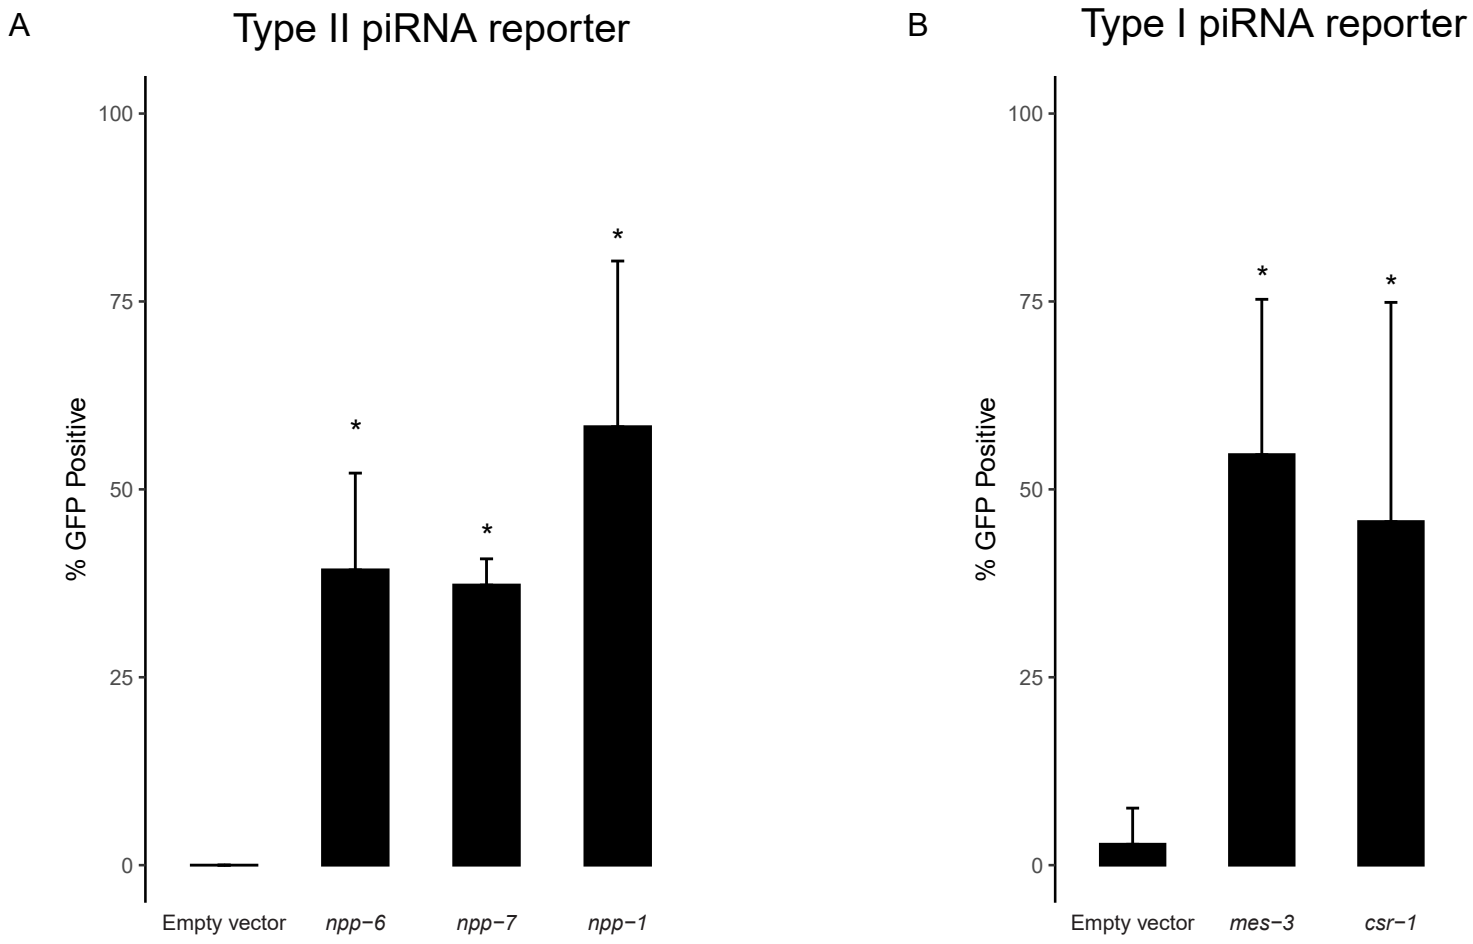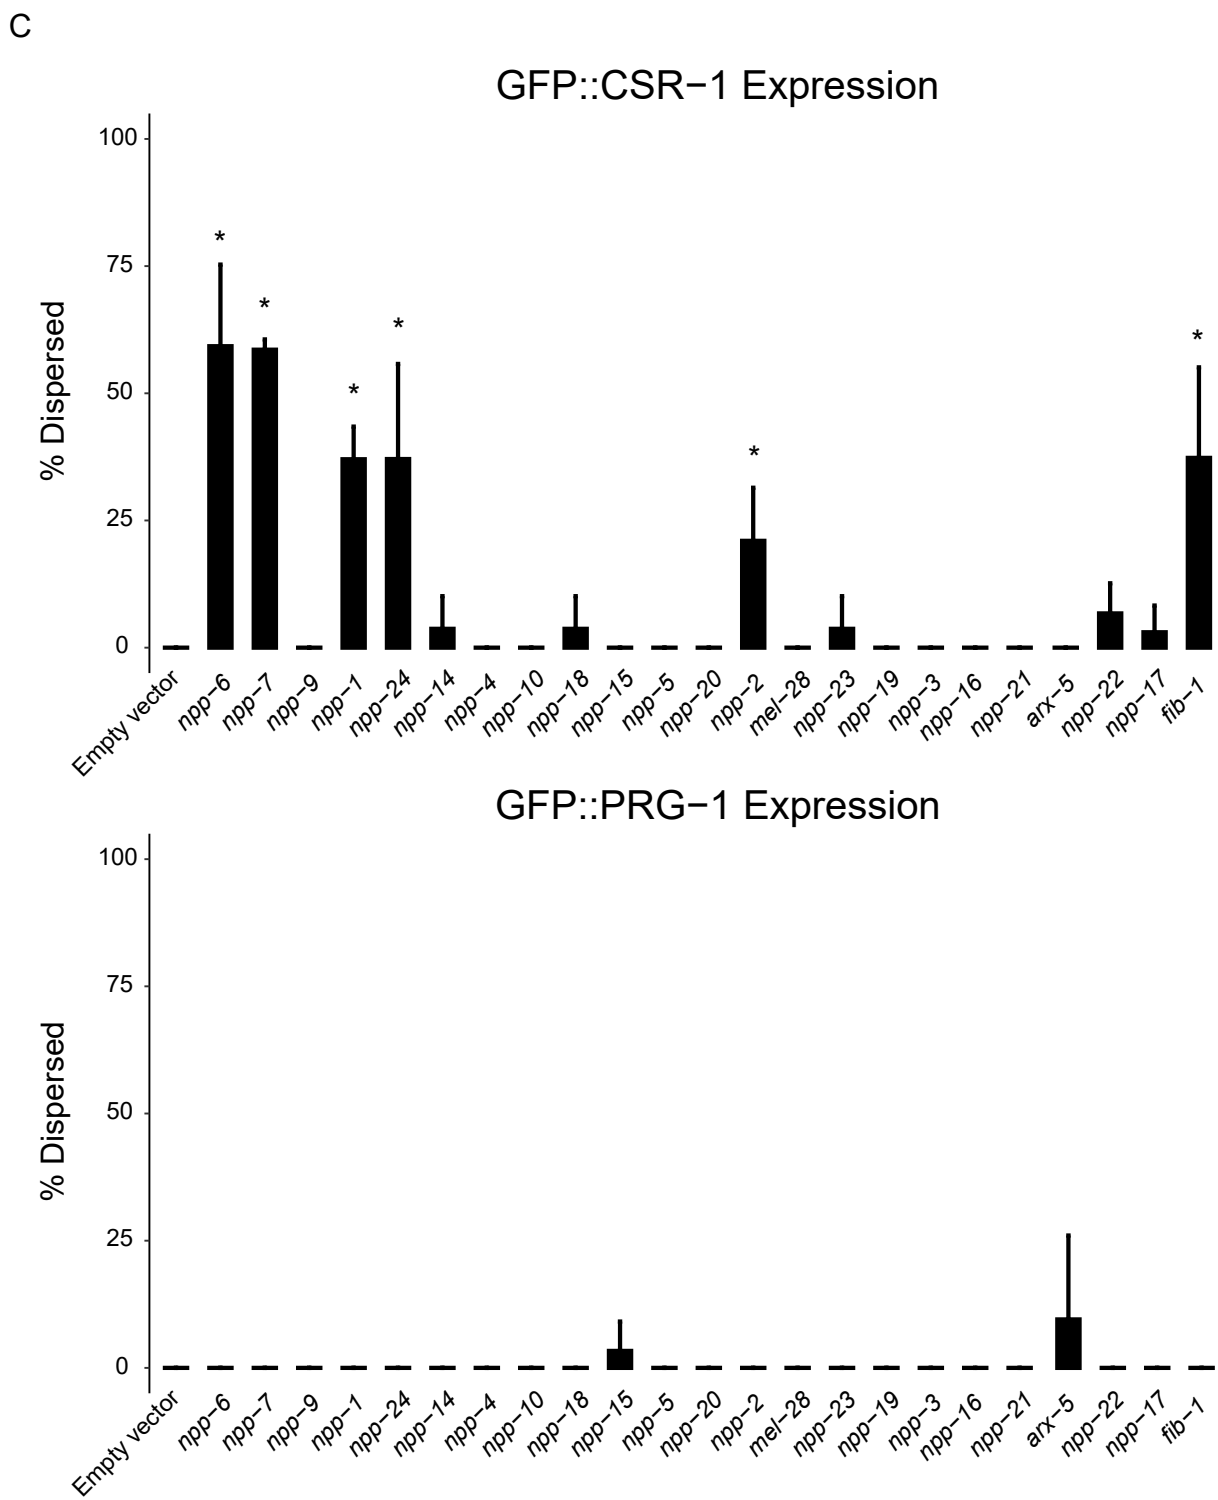

# Figure S3, continued

D

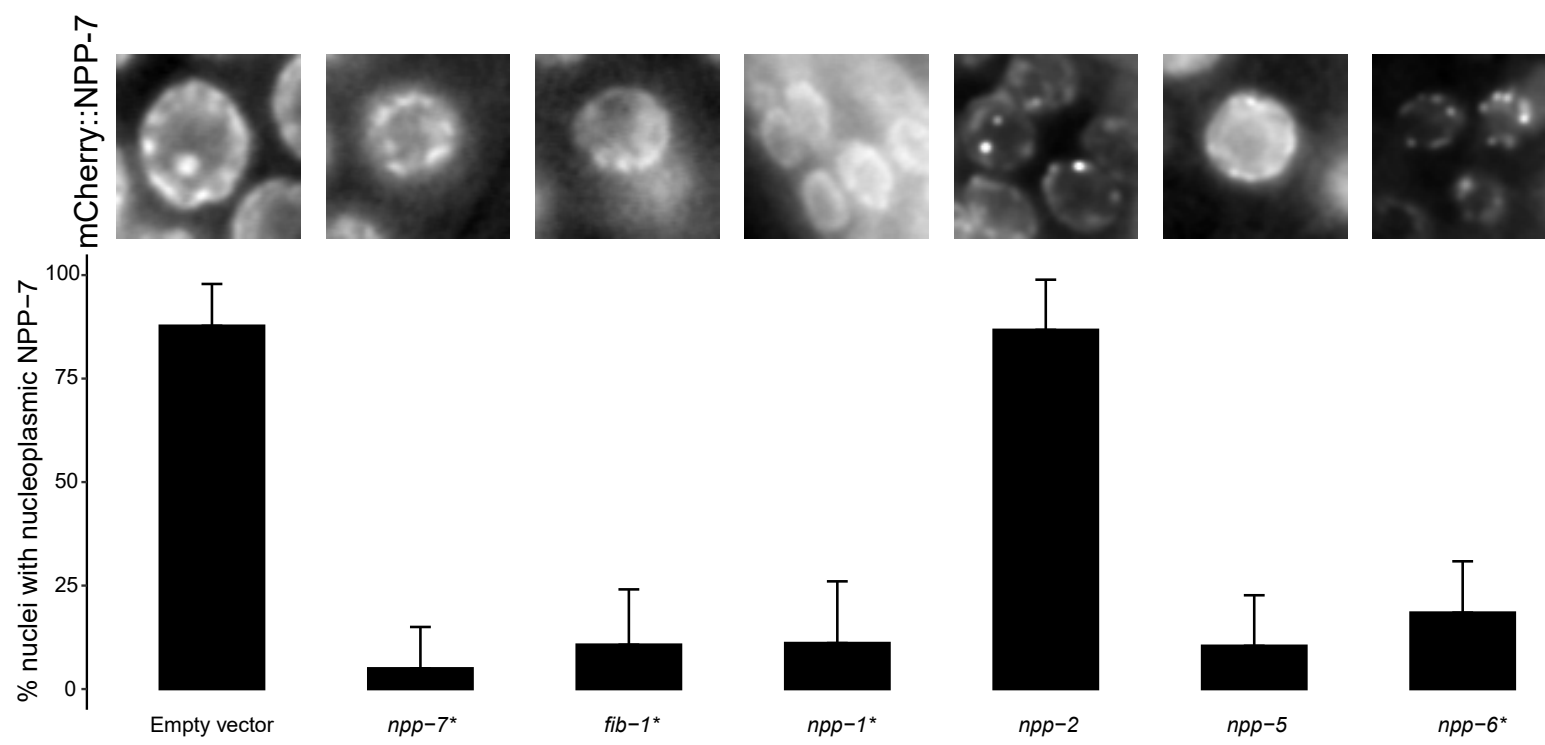

\* = also activated piRNA reporter

# Figure S4

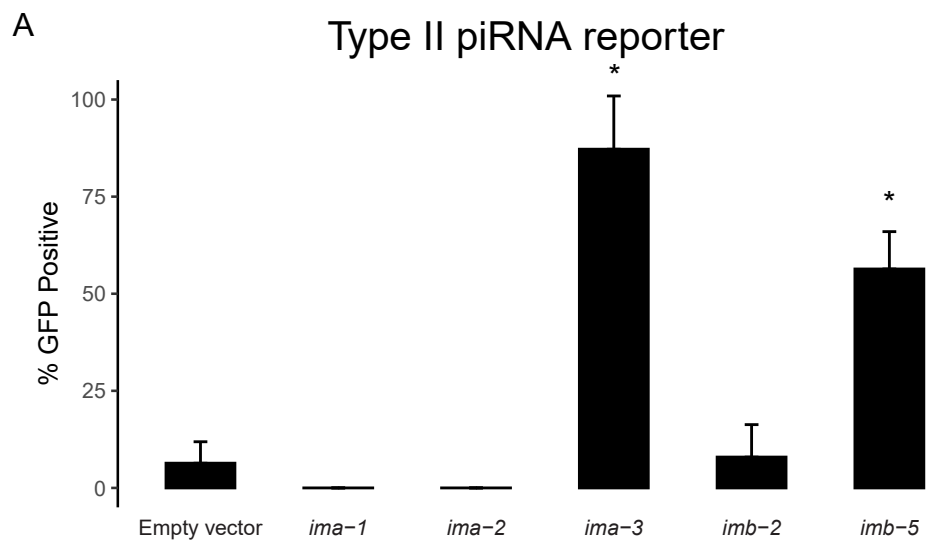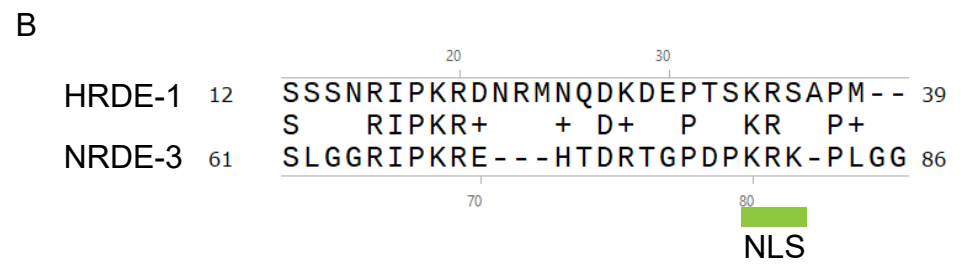

Supplement: media-1.pdf [file media-1.pdf]
